# Supplementary material
Source: publisher site journal article supplement (https://www.dovepress.com/article/270433)

**Supplementary Figure 1.** Western blot analysis of UVRAG was used to test the knocking-down efficiency of siUVRAG in Fadu cells.


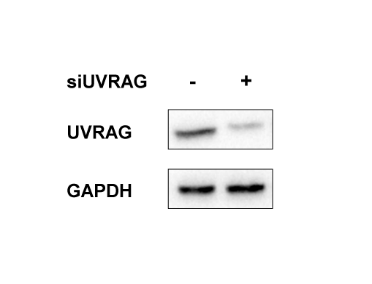

Supplement: Supplementary file 1 [file get_supplementary_file.php]
